# Supplementary material for: Association of Medicare Part D Benzodiazepine Coverage Expansion With Changes in Fall-Related Injuries and Overdoses Among Medicare Advantage Beneficiaries
Source: PubMed Central journal article supplement (PMC7125434; doi:10.1001/jamanetworkopen.2020.2051), 2020-04-03

## Supplementary Online Content

Maust DT, Lin LA, Goldstick JE, Haffajee RL, Brownlee R, Bohnert ASB. Association of Medicare Part D benzodiazepine coverage expansion with changes in fall-related injuries and overdoses among Medicare Advantage beneficiaries. *JAMA Netw Open*. 2020;3(4):e202051. doi:10.1001/jamanetworkopen.2020.2051

**eTable 1.** ICD-9-CM Codes Used to Derive Select Clinical Characteristics

**eTable 2.** Interrupted Time Series Analysis of Monthly Fall-Related Injury Among Medicare Advantage Beneficiaries Stratified by Age and Sex, 2010–2015

**eTable 3.** Fall-Related Injury Among Medicare Advantage Beneficiaries Prescribed Opioids Stratified by Age, 2010–2015

**eTable 4.** Overdose Among Medicare Advantage Beneficiaries Stratified by Age and Sex, 2010–2015

**eTable 5.** Overdose Among Medicare Advantage Beneficiaries Prescribed Opioids Stratified by Age, 2010–2015

**eFigure 1.** Monthly Proportions of Medicare Advantage and Commercially-Insured Enrollees (Comparison Group) With  $\geq 1$  Day of Benzodiazepine Available, 2010–2015

**eFigure 2.** Monthly Proportions of Medicare Advantage and Commercially-Insured Enrollees (Comparison Group) With  $\geq 1$  Day of Benzodiazepine Available Stratified by Age, 2010–2015

**This supplementary material has been provided by the authors to give readers additional information about their work.**

**eTable 1. ICD-9-CM codes used to derive select clinical characteristics**

| <b>Clinical characteristic</b> | <b>ICD-9-CM codes</b>                                                                                                                                                   |
|--------------------------------|-------------------------------------------------------------------------------------------------------------------------------------------------------------------------|
| Anxiety disorders              |                                                                                                                                                                         |
| Generalized anxiety disorder   | 300.02                                                                                                                                                                  |
| PTSD                           | 309.81                                                                                                                                                                  |
| Other anxiety disorders        | 300.0, 300.3                                                                                                                                                            |
| Dementia                       | 290.0, 290.1-290.13, 290.20, 290.21, 290.3, 290.40-290.43, 294.10, 294.11, 294.20, 294.21, 294.8, 331.0, 331.11, 331.19, 331.2-331.7, 331.81-331.83, 331.89, 331.9, 797 |
| Depression                     | 296.20-296.26, 296.30-296.36, 300.4, 311                                                                                                                                |
| Seizure disorders              | 345.00 345.01, 345.10, 345.11, 345.2, 345.3, 345.40, 345.41, 345.50, 345.51, 345.70, 345.71, 345.80, 345.81, 345.9, 345.91                                              |
| Insomnia                       | 307.40-307.49, 327.00-327.02, 327.09, 327.42, 780.51, 780.52                                                                                                            |

**eTable 2. Interrupted time series analysis of monthly fall-related injury among Medicare Advantage beneficiaries stratified by age and sex, 2010–2015**

|        | Pre-coverage (2010–2012)                                         |                             |                      | Post-coverage (2013–2015)                                        |                   |         | Pre- to Post-Coverage Change in Slope <sup>a</sup> |         |
|--------|------------------------------------------------------------------|-----------------------------|----------------------|------------------------------------------------------------------|-------------------|---------|----------------------------------------------------|---------|
|        | Fall-related injury per 10,000 person-days (95% CI) <sup>b</sup> | Slope (95% CI) <sup>c</sup> | P value <sup>c</sup> | Fall-related injury per 10,000 person-days (95% CI) <sup>b</sup> | Slope (95% CI)    | P value | Slope change (95% CI)                              | P value |
| 65-69  | 1.34 (1.31, 1.37)                                                | 0.00 (-0.01, 0.02)          | 0.76                 | 1.38 (1.33, 1.42)                                                | 0.06 (0.03, 0.09) | 0.001   | 0.05 (0.02, 0.09)                                  | 0.002   |
| Female | 1.55 (1.52, 1.59)                                                | 0.01 (-0.01, 0.03)          | 0.56                 | 1.62 (1.57, 1.67)                                                | 0.05 (0.02, 0.09) | 0.007   | 0.05 (0.01, 0.08)                                  | 0.02    |
| Male   | 1.07 (1.04, 1.10)                                                | -0.01 (-0.02, 0.01)         | 0.56                 | 1.07 (1.02, 1.11)                                                | 0.06 (0.03, 0.08) | <0.001  | 0.06 (0.03, 0.09)                                  | <0.001  |
| 70-74  | 1.50 (1.47, 1.54)                                                | 0.02 (0.00, 0.04)           | 0.10                 | 1.56 (1.52, 1.59)                                                | 0.05 (0.02, 0.07) | <0.001  | 0.03 (0.00, 0.06)                                  | 0.08    |
| Female | 1.77 (1.73, 1.82)                                                | 0.02 (0.00, 0.05)           | 0.10                 | 1.85 (1.80, 1.89)                                                | 0.04 (0.01, 0.07) | 0.01    | 0.02 (-0.02, 0.06)                                 | 0.29    |
| Male   | 1.17 (1.14, 1.21)                                                | 0.01 (-0.01, 0.04)          | 0.18                 | 1.21 (1.18, 1.24)                                                | 0.05 (0.03, 0.07) | <0.001  | 0.03 (0.00, 0.06)                                  | 0.04    |
| 75-79  | 1.84 (1.80, 1.89)                                                | 0.03 (0.00, 0.05)           | 0.07                 | 1.95 (1.90, 1.99)                                                | 0.06 (0.03, 0.09) | 0.001   | 0.03 (-0.01, 0.07)                                 | 0.13    |
| Female | 2.19 (2.14, 2.25)                                                | 0.03 (0.00, 0.06)           | 0.10                 | 2.31 (2.24, 2.38)                                                | 0.06 (0.01, 0.10) | 0.02    | 0.03 (-0.03, 0.08)                                 | 0.33    |
| Male   | 1.39 (1.34, 1.45)                                                | 0.03 (-0.01, 0.06)          | 0.12                 | 1.49 (1.45, 1.53)                                                | 0.06 (0.03, 0.08) | <0.001  | 0.03 (-0.01, 0.07)                                 | 0.16    |
| 80+    | 3.20 (3.15, 3.24)                                                | 0.04 (0.01, 0.06)           | 0.006                | 3.30 (3.23, 3.37)                                                | 0.16 (0.11, 0.20) | <0.001  | 0.12 (0.07, 0.17)                                  | <0.001  |
| Female | 3.65 (3.61, 3.70)                                                | 0.06 (0.03, 0.08)           | <0.001               | 3.78 (3.70, 3.85)                                                | 0.17 (0.12, 0.22) | <0.001  | 0.11 (0.06, 0.17)                                  | <0.001  |
| Male   | 2.41 (2.36, 2.47)                                                | 0.03 (-0.01, 0.06)          | 0.14                 | 2.53 (2.45, 2.60)                                                | 0.13 (0.08, 0.18) | <0.001  | 0.11 (0.05, 0.16)                                  | <0.001  |

CI: confidence interval

<sup>a</sup> Policy change is the Medicare Part D expanded coverage of benzodiazepines starting in January 2013.

<sup>b</sup> During first month of the period.

<sup>c</sup> All slope, slope changes, and P values reported were obtained from regression models that included fixed effects for month.

**eTable 3. Interrupted time series analysis of monthly fall-related injury among Medicare Advantage beneficiaries prescribed opioids stratified by age, 2010–2015**

|       | Pre-coverage (2010–2012)                                         |                             |                      | Post-coverage (2013–2015)                                        |                    |         | Pre- to Post-Coverage Change in Slope <sup>a</sup> |         |
|-------|------------------------------------------------------------------|-----------------------------|----------------------|------------------------------------------------------------------|--------------------|---------|----------------------------------------------------|---------|
|       | Fall-related injury per 10,000 person-days (95% CI) <sup>b</sup> | Slope (95% CI) <sup>c</sup> | P value <sup>c</sup> | Fall-related injury per 10,000 person-days (95% CI) <sup>b</sup> | Slope (95% CI)     | P value | Slope change (95% CI)                              | P value |
| 65-69 | 5.70 (5.49, 5.90)                                                | -0.09 (-0.21, 0.03)         | 0.16                 | 5.71 (5.53, 5.90)                                                | 0.16 (0.04, 0.28)  | 0.01    | 0.25 (0.08, 0.42)                                  | 0.005   |
| 70-74 | 6.15 (5.98, 6.33)                                                | -0.05 (-0.15, 0.05)         | 0.34                 | 6.02 (5.86, 6.19)                                                | 0.20 (0.09, 0.30)  | 0.002   | 0.25 (0.10, 0.40)                                  | 0.002   |
| 75-79 | 7.07 (6.80, 7.33)                                                | -0.03 (-0.18, 0.12)         | 0.68                 | 6.94 (6.69, 7.18)                                                | 0.15 (-0.01, 0.31) | 0.09    | 0.18 (-0.04, 0.40)                                 | 0.12    |
| 80+   | 9.84 (9.65, 10.02)                                               | -0.12 (-0.23, -0.02)        | 0.03                 | 9.48 (9.30, 9.67)                                                | 0.26 (0.14, 0.38)  | <0.001  | 0.38 (0.22, 0.54)                                  | <0.001  |

CI: confidence interval

<sup>a</sup> Policy change is the Medicare Part D expanded coverage of benzodiazepines starting in January 2013.

<sup>b</sup> During first month of the period.

<sup>c</sup> All slope, slope changes, and P values reported were obtained from regression models that included fixed effects for month.

**eTable 4. Interrupted time series analysis of monthly overdose among Medicare Advantage beneficiaries stratified by age and sex, 2010–2015**

|        | Pre-coverage (2010–2012)                               |                             |                      | Post-coverage (2013–2015)                              |                     |         | Pre- to Post-Coverage Change in Slope <sup>a</sup> |         |
|--------|--------------------------------------------------------|-----------------------------|----------------------|--------------------------------------------------------|---------------------|---------|----------------------------------------------------|---------|
|        | Overdose per 100,000 person-days (95% CI) <sup>b</sup> | Slope (95% CI) <sup>c</sup> | P value <sup>c</sup> | Overdose per 100,000 person-days (95% CI) <sup>b</sup> | Slope (95% CI)      | P value | Slope change (95% CI)                              | P value |
| 65-69  | 1.31 (1.22, 1.40)                                      | -0.14 (-0.19, -0.09)        | <0.001               | 0.86 (0.81, 0.91)                                      | 0.10 (0.06, 0.13)   | <0.001  | 0.23 (0.17, 0.30)                                  | <0.001  |
| Female | 1.32 (1.19, 1.45)                                      | -0.08 (-0.16, -0.01)        | 0.04                 | 0.98 (0.91, 1.05)                                      | 0.06 (0.02, 0.11)   | 0.01    | 0.15 (0.06, 0.24)                                  | 0.003   |
| Male   | 1.31 (1.20, 1.42)                                      | -0.21 (-0.27, -0.15)        | <0.001               | 0.71 (0.64, 0.79)                                      | 0.13 (0.08, 0.18)   | <0.001  | 0.34 (0.26, 0.42)                                  | <0.001  |
| 70-74  | 1.35 (1.27, 1.43)                                      | -0.10 (-0.14, -0.05)        | <0.001               | 1.02 (0.95, 1.09)                                      | 0.05 (0.01, 0.10)   | 0.05    | 0.15 (0.08, 0.21)                                  | <0.001  |
| Female | 1.47 (1.37, 1.57)                                      | -0.12 (-0.17, -0.06)        | <0.001               | 1.18 (1.09, 1.28)                                      | 0.00 (-0.06, 0.06)  | 0.89    | 0.12 (0.04, 0.20)                                  | 0.007   |
| Male   | 1.21 (1.10, 1.32)                                      | -0.07 (-0.13, -0.01)        | 0.03                 | 0.81 (0.72, 0.90)                                      | 0.11 (0.05, 0.17)   | 0.002   | 0.18 (0.10, 0.27)                                  | <0.001  |
| 75-79  | 1.61 (1.52, 1.70)                                      | -0.14 (-0.20, -0.09)        | <0.001               | 1.10 (1.01, 1.19)                                      | 0.13 (0.07, 0.19)   | <0.001  | 0.27 (0.19, 0.35)                                  | <0.001  |
| Female | 1.57 (1.45, 1.70)                                      | -0.10 (-0.18, -0.03)        | 0.01                 | 1.19 (1.06, 1.33)                                      | 0.11 (0.02, 0.20)   | 0.02    | 0.21 (0.10, 0.33)                                  | <0.001  |
| Male   | 1.65 (1.44, 1.86)                                      | -0.19 (-0.32, -0.07)        | 0.004                | 0.98 (0.87, 1.09)                                      | 0.15 (0.07, 0.22)   | <0.001  | 0.34 (0.19, 0.49)                                  | <0.001  |
| 80+    | 1.60 (1.50, 1.69)                                      | -0.06 (-0.12, -0.01)        | 0.03                 | 1.47 (1.41, 1.53)                                      | 0.00 (-0.03, 0.04)  | 0.87    | 0.07 (0.00, 0.14)                                  | 0.06    |
| Female | 1.60 (1.50, 1.70)                                      | -0.05 (-0.11, 0.00)         | 0.09                 | 1.48 (1.38, 1.57)                                      | 0.02 (-0.04, 0.09)  | 0.51    | 0.08 (-0.01, 0.16)                                 | 0.10    |
| Male   | 1.60 (1.46, 1.73)                                      | -0.08 (-0.16, -0.01)        | 0.04                 | 1.46 (1.34, 1.58)                                      | -0.03 (-0.10, 0.05) | 0.05    | 0.05 (-0.05, 0.16)                                 | 0.03    |

CI: confidence interval

<sup>a</sup> Policy change is the Medicare Part D expanded coverage of benzodiazepines starting in January 2013.

<sup>b</sup> During first month of the period.

<sup>c</sup> All slope, slope changes, and P values reported were obtained from regression models that included fixed effects for month.

**eTable 5. Interrupted time series analysis of monthly overdose among Medicare Advantage beneficiaries prescribed opioids stratified by age, 2010–2015**

|       | Pre-coverage (2010–2012)                                     |                                   |                            | Post-coverage (2013–2015)                                    |                       |                | Pre- to Post-Coverage Change in Slope <sup>a</sup> |                |
|-------|--------------------------------------------------------------|-----------------------------------|----------------------------|--------------------------------------------------------------|-----------------------|----------------|----------------------------------------------------|----------------|
|       | <b>Overdose per 100,000 person-days (95% CI)<sup>b</sup></b> | <b>Slope (95% CI)<sup>c</sup></b> | <b>P value<sup>c</sup></b> | <b>Overdose per 100,000 person-days (95% CI)<sup>b</sup></b> | <b>Slope (95% CI)</b> | <b>P value</b> | <b>Slope change (95% CI)</b>                       | <b>P value</b> |
| 65-69 | 4.59 (4.19, 4.99)                                            | -0.27 (-0.50, -0.04)              | 0.03                       | 3.62 (3.21, 4.04)                                            | 0.31 (0.05, 0.58)     | 0.03           | 0.59 (0.24, 0.94)                                  | 0.002          |
| 70-74 | 3.84 (3.43, 4.25)                                            | 0.05 (-0.18, 0.29)                | 0.66                       | 3.69 (3.25, 4.12)                                            | 0.19 (-0.10, 0.47)    | 0.21           | 0.13 (-0.23, 0.50)                                 | 0.48           |
| 75-79 | 4.86 (4.39, 5.33)                                            | -0.42 (-0.68, -0.15)              | 0.01                       | 3.48 (3.03, 3.92)                                            | 0.34 (0.06, 0.63)     | 0.03           | 0.76 (0.36, 1.15)                                  | <0.001         |
| 80+   | 3.44 (3.09, 3.79)                                            | 0.22 (0.02, 0.42)                 | 0.04                       | 4.01 (3.58, 4.43)                                            | -0.13 (-0.40, 0.15)   | 0.37           | -0.35 (-0.68, -0.01)                               | 0.05           |

CI: confidence interval

<sup>a</sup> Policy change is the Medicare Part D expanded coverage of benzodiazepines starting in January 2013.

<sup>b</sup> During first month of the period.

<sup>c</sup> All slope, slope changes, and P values reported were obtained from regression models that included fixed effects for month.

**eFigure 1. Monthly proportions of Medicare Advantage and commercially-insured enrollees (comparison group) with  $\geq 1$  day of benzodiazepine available, 2010–2015**

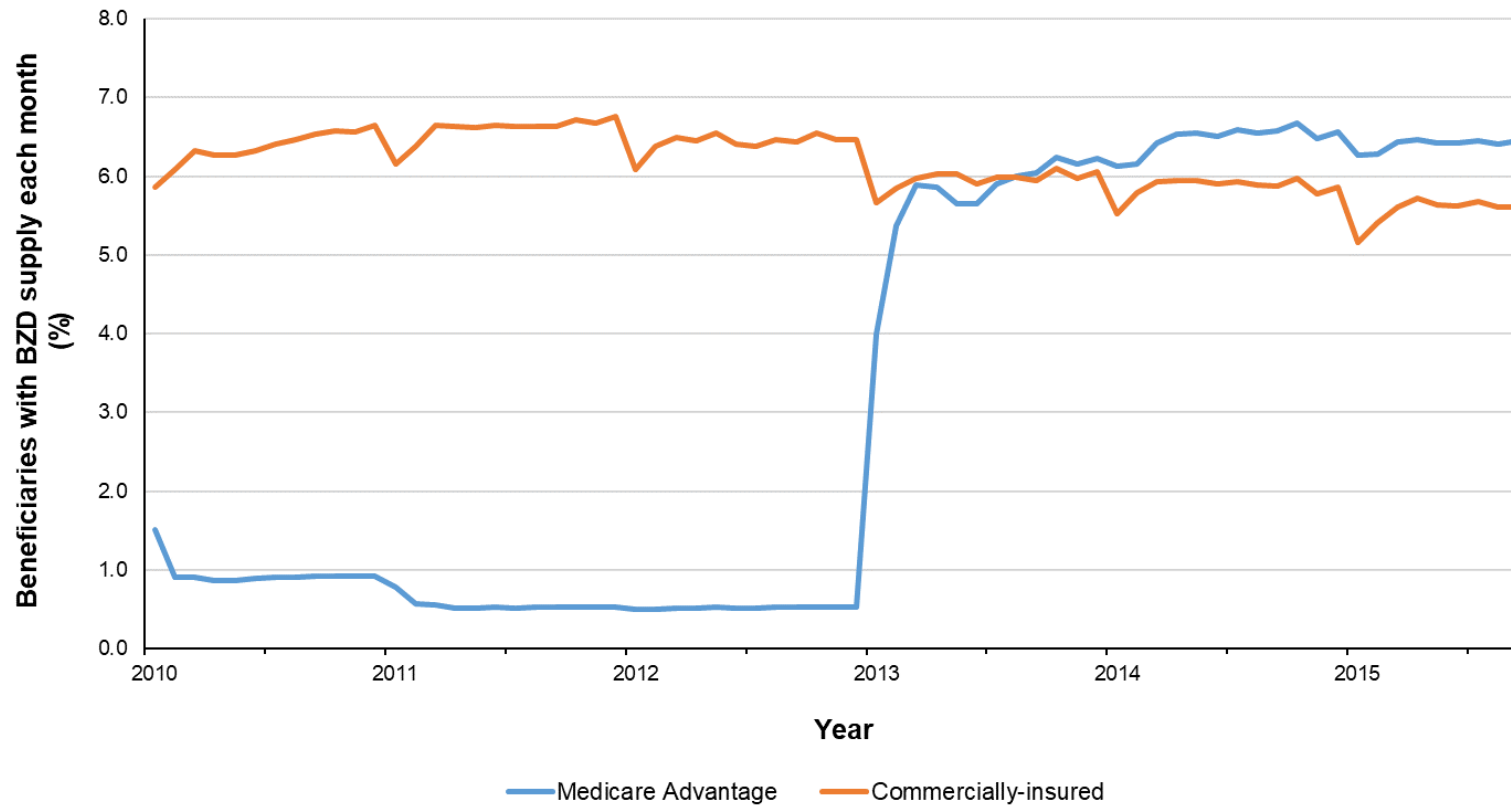

The date of the prescription claim and days'-supply field were used to determine whether beneficiaries possessed benzodiazepines in a given month.

**eFigure 2. Monthly proportions of Medicare Advantage and commercially-insured enrollees (comparison group) with  $\geq 1$  day of benzodiazepine available stratified by age, 2010–2015**

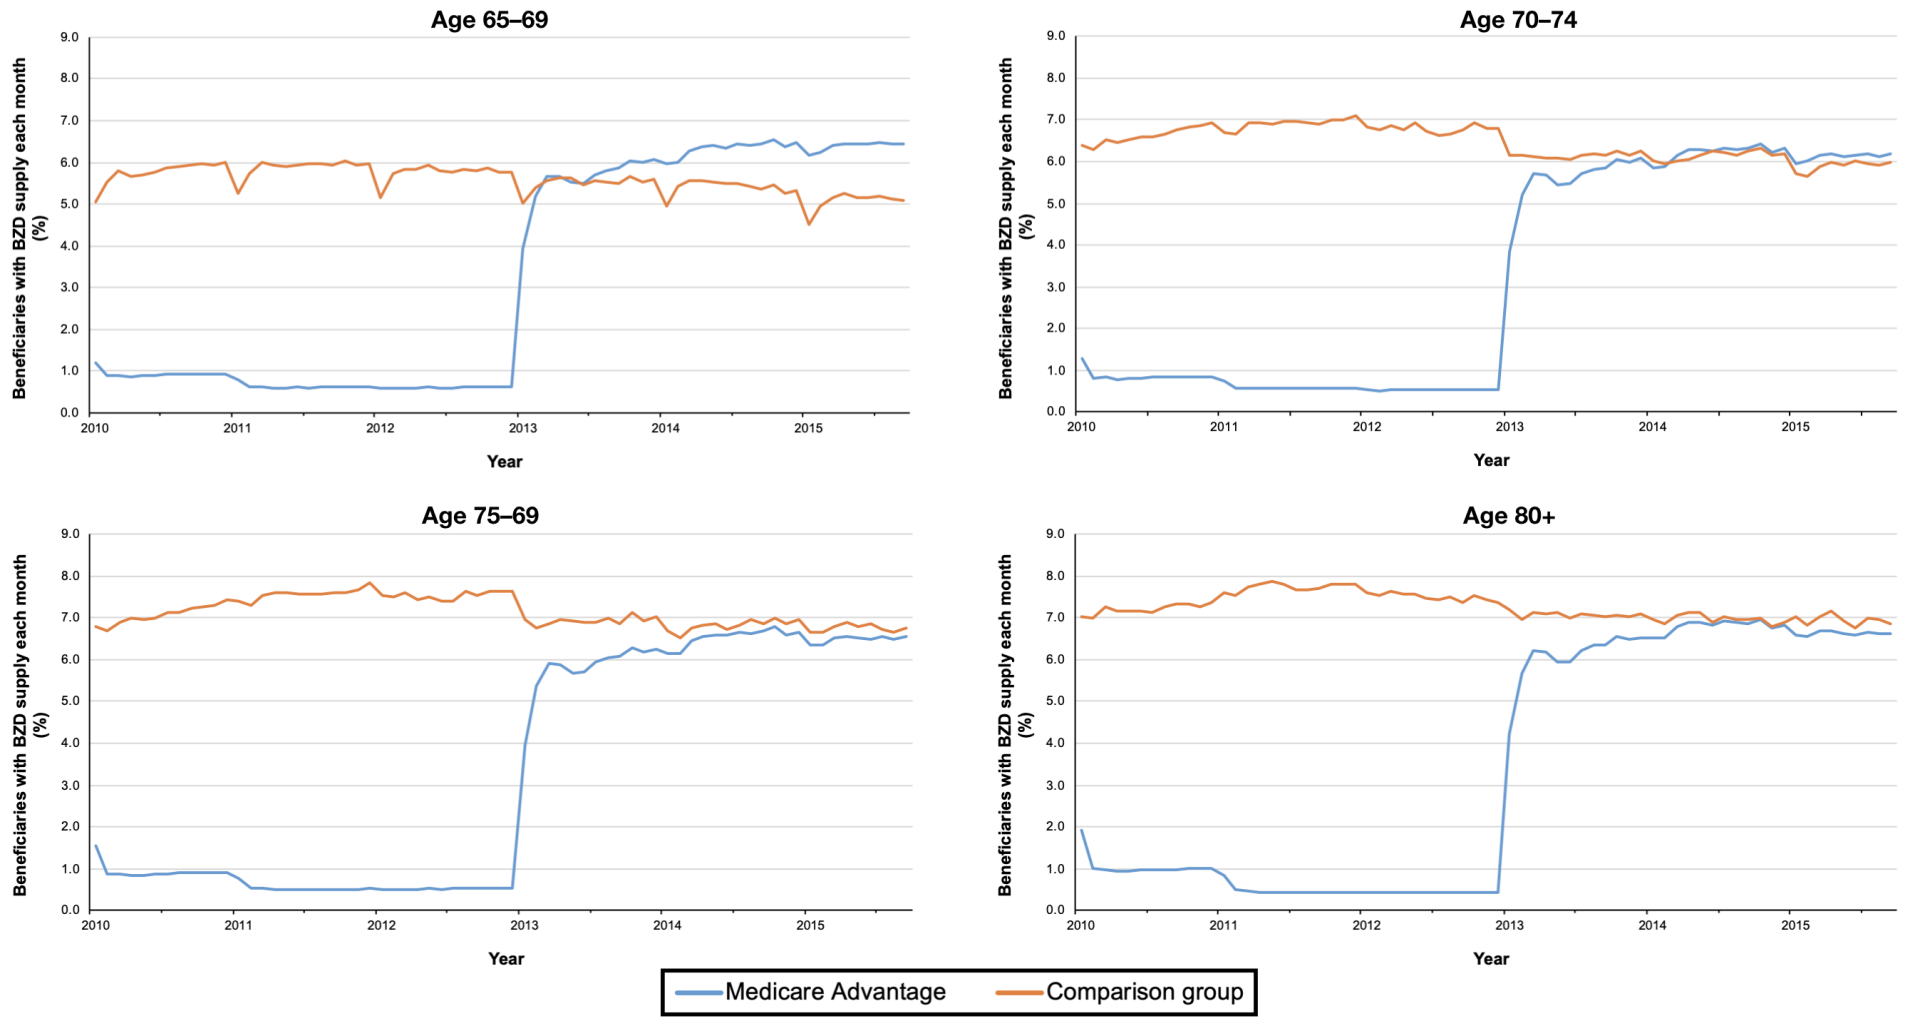

Supplement: jamanetwopen-3-e202051-s001.pdf [file jamanetwopen-3-e202051-s001.pdf]
